# Supplementary material
Source: publisher site journal article supplement (https://www.dovepress.com/article/603681)
Supplement: Supplementary file 1 [file 603681%20Revised%20Supplementary%20Table%201.docx]

**Supplementary Table 1.** Analytical methods and positivity thresholds for the autoantibody assays evaluated in this study.

*All assays were performed in the Department of Laboratory Medicine, King Fahd University Hospital, on the routine clinical immunology service. Chemiluminescent immunoassays were run on the BioFlash analyser and results are expressed in chemiluminescent units (CU); indirect immunofluorescence assays used the appropriate substrate (HEp-2 cells for antinuclear antibody and the relevant tissue substrates for the remaining immunofluorescence assays). Thresholds are those used by the laboratory to define a positive result; for the antinuclear antibody, a study-specific positivity threshold of ≥1:160 was applied. A dash (—) indicates that a fixed numerical threshold was not applied or was not available.*

| **Autoantibody / assay** | **Analytical method (platform)** | **Positivity threshold** |
| --- | --- | --- |
| Antinuclear antibody (ANA) | Indirect immunofluorescence (IIF) on HEp-2 cells | Assay cutoff ≥1:40; study positivity threshold ≥1:160 |
| Anti-double-stranded DNA (anti-dsDNA) | Indirect immunofluorescence (IIF) | Titre ≥1:20 |
| Anti-Smith (anti-Sm) | Chemiluminescent immunoassay (BioFlash) | ≥20 CU |
| Anti-Ro/SSA | Chemiluminescent immunoassay (BioFlash) | ≥20 CU |
| Anti-La/SSB | Chemiluminescent immunoassay (BioFlash) | ≥20 CU |
| Anti-ribonucleoprotein (anti-RNP) | Chemiluminescent immunoassay (BioFlash) | ≥20 CU |
| Anti-Scl-70 (anti-topoisomerase I) | Chemiluminescent immunoassay (BioFlash) | ≥20 CU |
| Anti-β2-glycoprotein I (IgG and IgM) | Chemiluminescent immunoassay (BioFlash) | ≥20 CU (each isotype) |
| Anti-cardiolipin (IgG and IgM) | Chemiluminescent immunoassay (BioFlash) | ≥20 CU (each isotype) |
| Lupus anticoagulant | Dilute Russell viper venom time (dRVVT) | Reported as positive / negative |
| Rheumatoid factor (RF) | Chemiluminescent immunoassay | ≥30 IU/mL |
| Anti-cyclic citrullinated peptide (anti-CCP) | Chemiluminescent immunoassay | ≥20 CU |
| Antineutrophil cytoplasmic antibody (ANCA) | Indirect immunofluorescence (IIF) | Titre ≥1:20 |
| Proteinase 3 (PR3) antibody | Chemiluminescent immunoassay (BioFlash) | ≥20 CU |
| Myeloperoxidase (MPO) antibody | Chemiluminescent immunoassay (BioFlash) | ≥20 CU |
| Anti-thyroid peroxidase (anti-TPO) | Chemiluminescent immunoassay | ≥35 CU |
| Anti-thyroglobulin | Chemiluminescent immunoassay | ≥4.11 IU/mL |
| Anti-mitochondrial antibody (AMA) | Indirect immunofluorescence (IIF) | Titre ≥1:40 |
| Anti-liver-kidney microsomal antibody (anti-LKM) | Indirect immunofluorescence (IIF) | Titre ≥1:40 |
| Anti-smooth muscle antibody (ASMA) | Indirect immunofluorescence (IIF) | Titre ≥1:40 |
| Anti-endomysial antibody (EMA) | Indirect immunofluorescence (IIF) | Titre ≥1:10 |
| Anti-tissue transglutaminase (anti-tTG, IgG and IgM) | Chemiluminescent immunoassay (BioFlash) | ≥30 CU (each isotype) |

*CU, chemiluminescent units; IgG, immunoglobulin G; IgM, immunoglobulin M; IU/mL, international units per millilitre.*
